# Supplementary material for: Infection of specific strains of Streptococcus mutans, oral bacteria, confers a risk of ulcerative colitis
Source: PubMed Central journal article supplement — Sci Rep. 2012 Mar 26;2:332. doi: 10.1038/srep00332 (PMC3312205; doi:10.1038/srep00332), 2012-03-26
Supplement: srep00332-s1.pdf [file srep00332-s1.pdf]

## Supplementary Information

### Infection of specific strains of *Streptococcus mutans*, oral bacteria, confers a risk of ulcerative colitis

Ayuchi Kojima<sup>1),2)</sup>, Kazuhiko Nakano<sup>1)</sup>, Koichiro Wada<sup>2)\*</sup>, Hirokazu Takahashi<sup>3)</sup>, Kazufumi Katayama<sup>2,4)</sup>, Masato Yoneda<sup>3)</sup>, Takuma Higurashi<sup>3)</sup>, Ryota Nomura<sup>1)</sup>, Kazuya Hokamura<sup>5)</sup>, Yoshinori Muranaka<sup>6)</sup>, Nobuyuki Matsushashi<sup>7)</sup>, Kazuo Umemura<sup>5)</sup>, Yoshinori Kamisaki<sup>2)</sup>, Atsushi Nakajima<sup>3)</sup>, Takashi Ooshima<sup>1)</sup>

<sup>1)</sup>Department of Pediatric Dentistry, and <sup>2)</sup>Department of Pharmacology,

Graduate School of Dentistry, Osaka University, Osaka, 565-0871, Japan.

<sup>3)</sup>Gastroenterology Division, Yokohama City University School of Medicine, Yokohama, 236-0004, Japan.

<sup>4)</sup>Department of Biological Chemistry, Graduate School of Pharmaceutical Sciences,  
Osaka University, Osaka, 565-0871, Japan.

<sup>5)</sup>Department of Pharmacology, Hamamatsu University School of Medicine,  
Hamamatsu, 431-3192, Japan.

<sup>6)</sup>Laboratory for Ultrastructure Researches, Hamamatsu University School of Medicine, Hamamatsu,  
Shizuoka 431-3192, Japan.

<sup>7)</sup>Department of Gastroenterology, Kanto Medical Center, NTT East, Tokyo 141-8625, Japan.

#### Correspondence should be addressed to:

Koichiro Wada, Ph.D., Department of Pharmacology, Graduate School of Dentistry, Osaka University, 1-8 Yamadaoka, Suita, Osaka 565-0871, Japan.

E-mail; [kwada@dent.osaka-u.ac.jp](mailto:kwada@dent.osaka-u.ac.jp), Fax; +81-6-6879-2914.

#### Supplementary information includes:

Supplementary Tables S1 to S3, Supplementary Figures S1 to S6.

## Supplementary Tables

**Supplementary Table S1. Summary of IBD patients.**

---

|                                        |    |                                                                    |
|----------------------------------------|----|--------------------------------------------------------------------|
| Total number                           |    | 98                                                                 |
| (Male:Female)                          |    | (59:39)                                                            |
| Age (mean $\pm$ SD)                    |    | 44.51 $\pm$ 16.33                                                  |
| Diagnosis (Severity)                   | UC | 98 (mild: 48, moderate: 7, remission: 43)                          |
| Duration of disease<br>(mean $\pm$ SD) |    | 7.64 $\pm$ 6.44 years                                              |
| Extent                                 | UC | entire colon: 33<br>left hemicolon: 43<br>rectum: 19<br>unknown: 3 |

---

Oral samples were collected from multiple institutes and hospitals. UC, ulcerative colitis; SD, standard deviation.

**Supplementary Table S2. Analysis of *S. mutans*-serotype and *cnm* in IBD patients.**

| <b>NO</b> | <b>gender</b> | <b>age</b> | <b>duration of disease</b> | <b>severity</b> | <b>extent</b>  | <b><i>S. mutans</i></b> | <b>serotype</b> | <b><i>Cnm</i></b> |
|-----------|---------------|------------|----------------------------|-----------------|----------------|-------------------------|-----------------|-------------------|
| 1         | M             | 34         | 2y                         | moderate        | entire colon   | +                       | <i>c</i>        | -                 |
| 2         | M             | 24         | 2y                         | moderate        | left hemicolon | +                       | <i>c</i>        | -                 |
| 3         | F             | 23         | 15y                        | mild            | left hemicolon | +                       | <i>c</i>        | -                 |
| 4         | M             | 35         | 13y                        | mild            | left hemicolon | -                       |                 |                   |
| 5         | M             | 31         | 10y                        | mild            | rectum         | -                       |                 |                   |
| 6         | M             | 42         | 5y                         | mild            | rectum         | +                       | <i>c</i>        | +                 |
| 7         | M             | 58         | 10y                        | mild            | left hemicolon | +                       | <i>c</i>        | -                 |
| 8         | M             | 64         | 14y                        | moderate        | left hemicolon | +                       | <i>k</i>        | +                 |
| 9         | F             | 71         | 10y                        | mild            | left hemicolon | +                       | <i>k</i>        | -                 |
| 10        | M             | 39         | 2y                         | moderate        | left hemicolon | +                       | <i>c</i>        | -                 |
| 11        | F             | 55         | 23y                        | moderate        | left hemicolon | +                       | <i>c</i>        | -                 |
| 12        | M             | 75         | 1y                         | remission       | entire colon   | +                       | <i>c</i>        | -                 |
| 13        | M             | 60         | 7y                         | remission       | entire colon   | +                       | <i>f</i>        | +                 |
| 14        | M             | 27         | 1y                         | remission       | left hemicolon | +                       | <i>c</i>        | -                 |
| 15        | F             | 54         | 4y                         | remission       | rectum         | +                       | <i>c</i>        | -                 |
| 16        | M             | 69         | 2m                         | mild            | left hemicolon | +                       | <i>c</i>        | -                 |
| 17        | M             | 33         | 4m                         | moderate        | entire colon   | +                       | <i>c</i>        | -                 |
| 18        | M             | 19         | 4m                         | mild            | entire colon   | +                       | <i>k</i>        | -                 |
| 19        | F             | 77         | 8m                         | remission       | entire colon   | +                       | <i>c</i>        | -                 |
| 20        | M             | 69         | 1y                         | mild            | N/A            | -                       |                 |                   |
| 21        | F             | 47         | 21y                        | remission       | left hemicolon | +                       | <i>f</i>        | +                 |
| 22        | F             | 47         | 13y                        | remission       | entire colon   | +                       | <i>f</i>        | +                 |
| 23        | F             | 52         | 17y                        | moderate        | left hemicolon | +                       | <i>c</i>        | +                 |
| 24        | M             | 58         | 3m                         | mild            | rectum         | +                       | <i>c</i>        | -                 |
| 25        | F             | 72         | 9y                         | mild            | rectum         | +                       | <i>c</i>        | -                 |
| 26        | F             | 79         | 24y                        | mild            | rectum         | -                       |                 |                   |
| 27        | M             | 36         | 9y                         | remission       | entire colon   | +                       | <i>e</i>        | -                 |
| 28        | F             | 32         | 11y                        | remission       | rectum         | -                       |                 |                   |
| 29        | M             | 49         | 19y                        | remission       | left hemicolon | -                       |                 |                   |
| 30        | F             | 43         | 10y                        | remission       | rectum         | -                       |                 |                   |
| 31        | M             | 70         | 2m                         | mild            | left hemicolon | +                       | <i>c</i>        | -                 |
| 32        | F             | 64         | 2y                         | mild            | left hemicolon | +                       | <i>k</i>        | -                 |
| 33        | F             | 64         | 12y                        | mild            | rectum         | -                       |                 |                   |
| 34        | F             | 62         | 3y                         | mild            | whole          | +                       | <i>c</i>        | -                 |
| 35        | M             | 27         | 7y                         | mild            | left hemicolon | -                       |                 |                   |
| 36        | M             | 36         | 4y                         | mild            | rectum         | -                       |                 |                   |
| 37        | F             | 33         | 12y                        | mild            | entire colon   | +                       | <i>f</i>        | +                 |

|    |   |    |     |           |                |   |          |   |
|----|---|----|-----|-----------|----------------|---|----------|---|
| 38 | M | 40 | 12y | mild      | left hemicolon | + | <i>c</i> | - |
| 39 | M | 47 | 2y  | mild      | rectum         | - |          |   |
| 40 | M | 44 | 19y | mild      | entire colon   | + | <i>f</i> | - |
| 41 | M | 39 | 4y  | mild      | entire colon   | - |          |   |
| 42 | M | 32 | 11y | mild      | left hemicolon | + | <i>c</i> | - |
| 43 | M | 46 | 5y  | mild      | left hemicolon | + | <i>f</i> | - |
| 44 | M | 72 | 3y  | mild      | entire colon   | + | <i>c</i> | - |
| 45 | F | 62 | 6y  | mild      | rectum         | - |          |   |
| 46 | F | 28 | 9y  | mild      | left hemicolon | - |          |   |
| 47 | M | 32 | 7y  | mild      | left hemicolon | + | <i>f</i> | + |
| 48 | M | 83 | 2y  | mild      | left hemicolon | + | <i>c</i> | - |
| 49 | F | 74 | 9y  | mild      | left hemicolon | + | <i>k</i> | - |
| 50 | M | 36 | 3y  | mild      | entire colon   | + | <i>c</i> | - |
| 51 | F | 36 | 2y  | mild      | entire colon   | - |          |   |
| 52 | M | 22 | 3y  | mild      | left hemicolon | + | <i>c</i> | - |
| 53 | M | 51 | 3y  | mild      | entire colon   | - |          |   |
| 54 | M | 70 | 24y | mild      | left hemicolon | - |          |   |
| 55 | M | 31 | 1y  | mild      | left hemicolon | - |          |   |
| 56 | M | 29 | 7y  | mild      | rectum         | + | <i>c</i> | - |
| 57 | F | 44 | 7y  | mild      | left hemicolon | + | <i>c</i> | - |
| 58 | F | 44 | 5y  | mild      | left hemicolon | - |          |   |
| 59 | M | 59 | 2y  | mild      | left hemicolon | - |          |   |
| 60 | M | 39 | 3y  | mild      | rectum         | - |          |   |
| 61 | F | 61 | 7y  | mild      | N/A            | + | <i>c</i> | - |
| 62 | M | 47 | 3y  | mild      | rectum         | - |          |   |
| 63 | M | 37 | 3y  | mild      | left hemicolon | - |          |   |
| 64 | M | 56 | 7y  | mild      | left hemicolon | + | <i>k</i> | + |
| 65 | F | 51 | 18y | mild      | entire colon   | + | <i>k</i> | + |
| 66 | F | 37 | 3y  | mild      | rectum         | - |          |   |
| 67 | M | 21 | 4y  | remission | entire colon   | - |          |   |
| 68 | F | 35 | 8y  | mild      | left hemicolon | - |          |   |
| 69 | M | 28 | 9y  | remission | entire colon   | + | <i>c</i> | - |
| 70 | F | 28 | 1y  | remission | left hemicolon | - |          |   |
| 71 | F | 42 | 13y | mild      | left hemicolon | - |          |   |
| 72 | M | 22 | 2y  | remission | rectum         | - |          |   |
| 73 | M | 51 | 36y | remission | entire colon   | - |          |   |
| 74 | F | 54 | 9y  | remission | entire colon   | - |          |   |
| 75 | M | 31 | 2y  | remission | entire colon   | - |          |   |
| 76 | M | 28 | 14y | mild      | entire colon   | - |          |   |
| 77 | F | 31 | 2y  | remission | left hemicolon | + | <i>c</i> | + |
| 78 | M | 57 | 8y  | remission | entire colon   | - |          |   |
| 79 | M | 31 | 7y  | remission | entire colon   | + | <i>c</i> | - |

|    |   |    |     |           |                |   |   |   |
|----|---|----|-----|-----------|----------------|---|---|---|
| 80 | F | 28 | 12y | remission | entire colon   | - |   |   |
| 81 | F | 23 | 14y | remission | entire colon   | + | c | - |
| 82 | M | 26 | 10y | remission | left hemicolon | - |   |   |
| 83 | F | 38 | 11y | remission | rectum         | - |   |   |
| 84 | M | 47 | 12y | remission | entire colon   | + | c | - |
| 85 | M | 68 | 1y  | mild      | entire colon   | - |   |   |
| 86 | F | 63 | 3y  | mild      | left hemicolon | + | c | - |
| 87 | F | 35 | 5y  | mild      | entire colon   | + | c | - |
| 88 | F | 39 | 15y | remission | entire colon   | + | c | - |
| 89 | M | 24 | 4y  | remission | entire colon   | + | c | - |
| 90 | M | 27 | 7y  | remission | left hemicolon | - |   |   |
| 91 | M | 36 | 3y  | mild      | entire colon   | + | c | - |
| 92 | F | 67 | 6y  | remission | entire colon   | + | c | - |
| 93 | M | 30 | 2y  | remission | left hemicolon | + | c | - |
| 94 | M | 37 | 8y  | remission | left hemicolon | + | c | - |
| 95 | F | 24 | 5y  | remission | rectum         | - |   |   |
| 96 | F | 48 | 8y  | remission | left hemicolon | - |   |   |
| 97 | M | 35 | 15y | remission | left hemicolon | + | c | - |
| 98 | M | 29 | 1y  | mild      | left hemicolon | - |   |   |

Among 98 IBD patients, 56 were *S. mutans* positive (57.14%). The detection frequency of the CBP-encoding *cnm* gene expressing *S. mutans* in the IBD patients was always confirmed by isolation and culture of the individual strains. Each isolation and identification of the *cnm*-positive or negative status was repeated multiple times. Various serotypes of *S. mutans* in patients were also investigated.

**Supplementary Table S3. Primer information.**

| Gene Name                            | Primer Set                                                         | PCR Product Size (bp) |
|--------------------------------------|--------------------------------------------------------------------|-----------------------|
| <b>GAPDH</b>                         | 5'-GCACAGTCAAGGCCGAGAAT-3'<br>5'-GCCTTCTCCATGGTGGTGAA-3'           | <b>151</b>            |
| <b>mouse TNF-<math>\alpha</math></b> | 5'-CCTGTAGCCCACGTCGTAGC-3'<br>5'-TTGACCTCAGCGCTGAGTTG-3'           | <b>374</b>            |
| <b>mouse IL-6</b>                    | 5'- GAGGATACCACTCCCAACAGACC-3'<br>5'- AAGTGCATCATCGTTGTTTCATACA-3' | <b>141</b>            |
| <b>mouse IFN-<math>\gamma</math></b> | 5'-AGCTCTGAGACAATGAACGC-3'<br>5'-GGACAATCTCTTCCCCACCC-3'           | <b>504</b>            |
| <b>human IFN-<math>\gamma</math></b> | 5'-TCGGTAACTGACTTGAATGTCCA-3'<br>5'-TCCTTTTTTCGCTTCCCTGTTTT-3'     | <b>100</b>            |

## Supplementary Figures

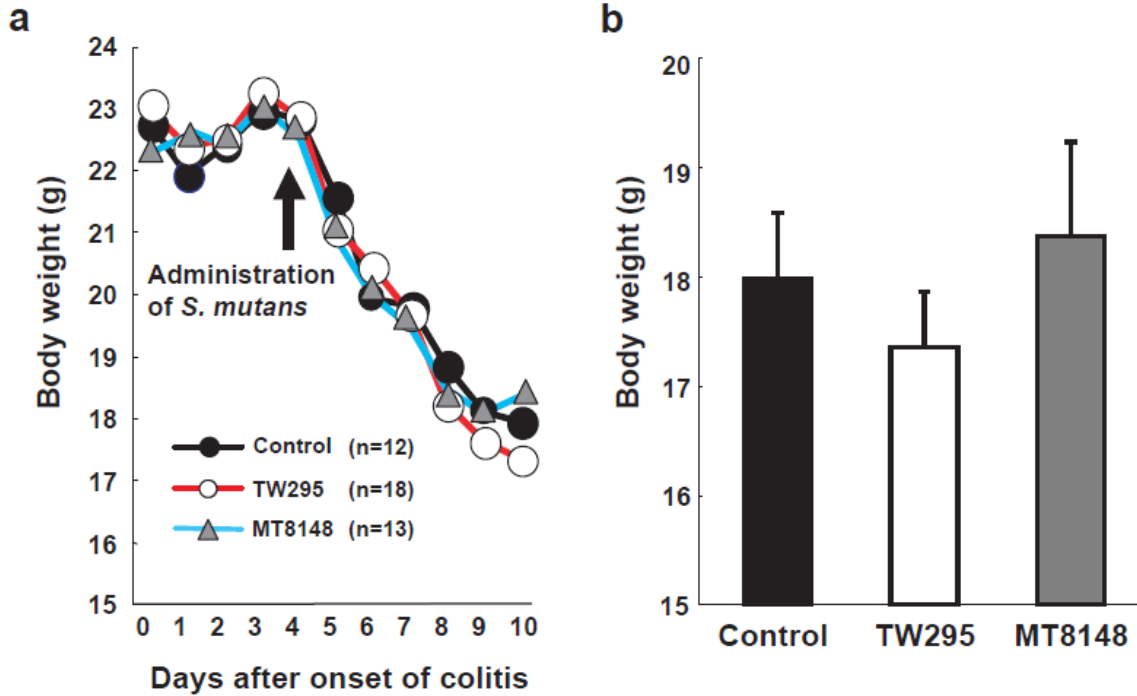

### Supplementary Figure S1. Aggravation of mouse colitis by TW295, a specific strain of *S. mutans*.

(a): Change in body weight up to day 10. Each point represents the mean value from 12-18 different animals.

(b): The body weights of each group on day 15. Each column represents the mean  $\pm$  standard error (SEM) from 12-18 different animals.

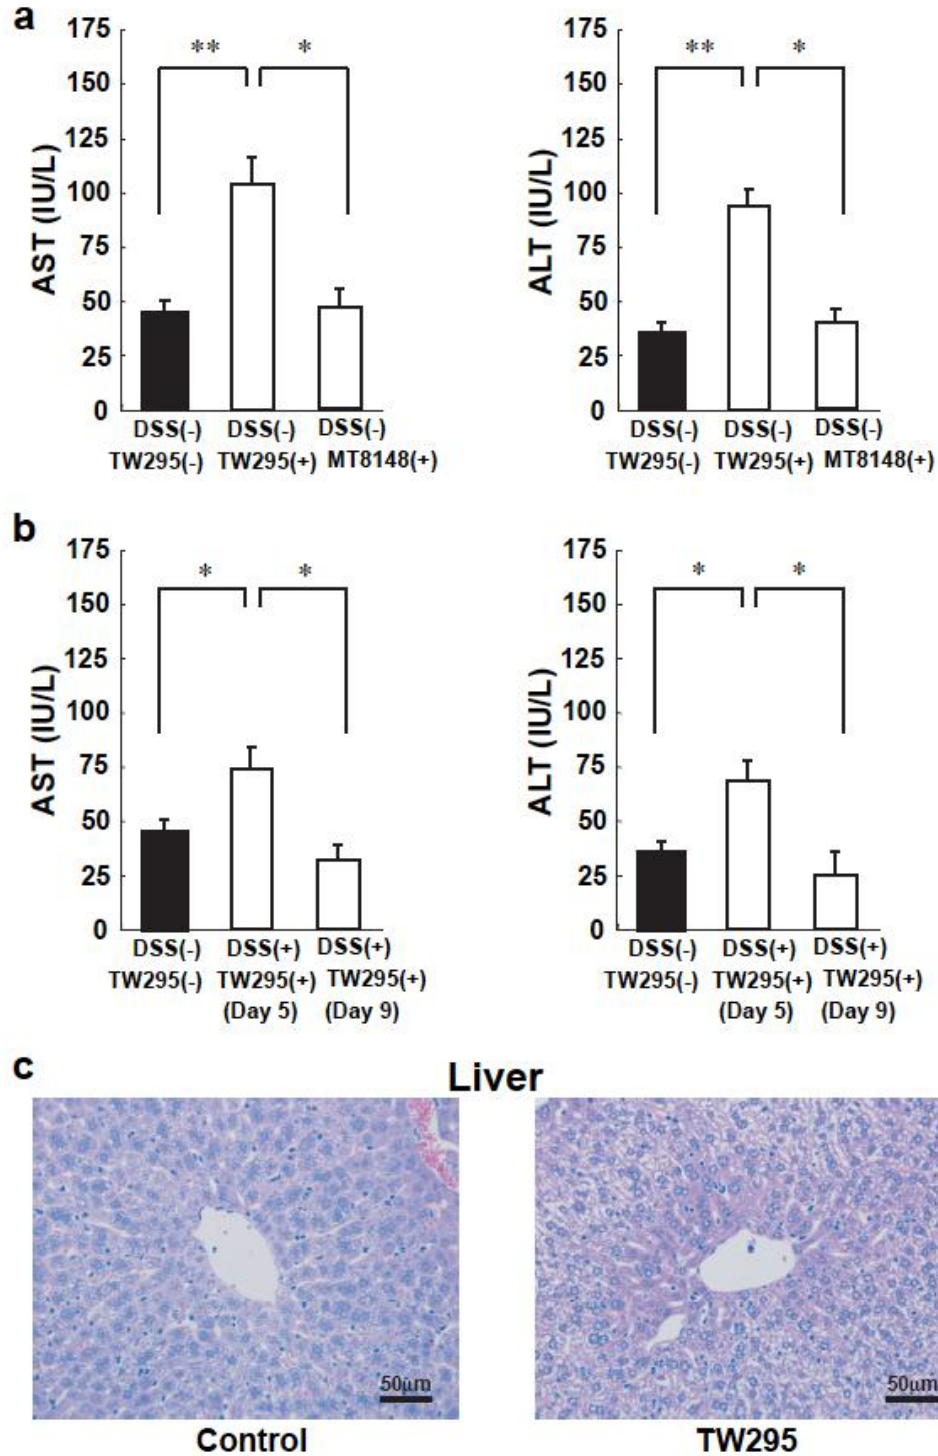

Supplementary Figure S2. Effect of TW295 on the liver is transient.



(a): Effect of bacterial administration on ALT and AST. Vehicle, TW295, or MT8148 was administered to the mice without DSS administration. Twenty-four hours after the administration of bacteria, blood samples were collected, and ALT and AST values were measured and expressed as IU/L. Each column represents the mean  $\pm$  SEM from 4-6 different animals. Statistical significance was determined using Bonferroni's method after analysis of variance (ANOVA). \*  $p < 0.05$ ; \*\*  $p < 0.01$ , respectively.

(b): Transient increase in ALT and AST after the administration of TW295. Twenty-four (as day 5) and 120 (as day 9) hours after the administration of TW295 under treatment with DSS, blood samples were collected, and ALT and AST values were measured. Each column represents the mean  $\pm$  SEM from 3-5 different animals. The increases in ALT and AST values produced by administration of TW295 were a transient response. \* $p < 0.05$ .

(c): Typical microscopic images of the liver in control and TW295-infected mice on day 10. No marked changes between control and TW295-infected mice were observed.

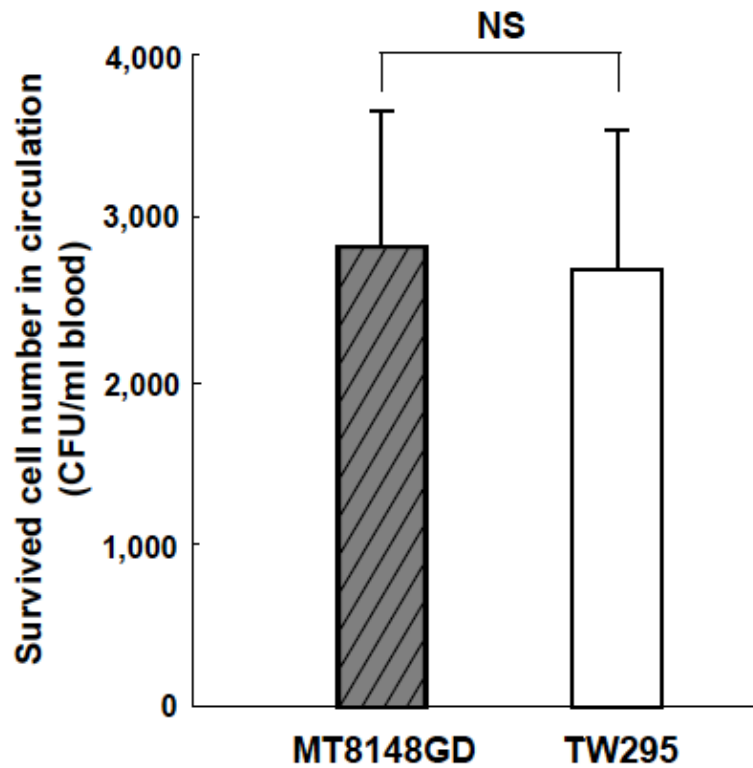

**Supplementary Figure S3. Survivability of MT8148GD in blood circulation.**

Survivability of MT8148GD, the isogenic mutant strain of MT8148 with a glucose defection in the side chain, was investigated in vivo colitis mice. Briefly, 30 min after the administration of MT8148GD or TW295 ( $1 \times 10^7$  CFU) in colitis mice, blood samples were collected. The samples (100  $\mu$ l) were inoculated onto MSB agar plates and anaerobically incubated according to the method described in Method section. The viable cell numbers were counted and survived cell numbers are expressed as CFU/ml blood. Each column represents the mean  $\pm$  SEM from 3-4 different animals. Statistical significance was determined using Student's t-test. NS; no significant ( $p=0.9425$ ).

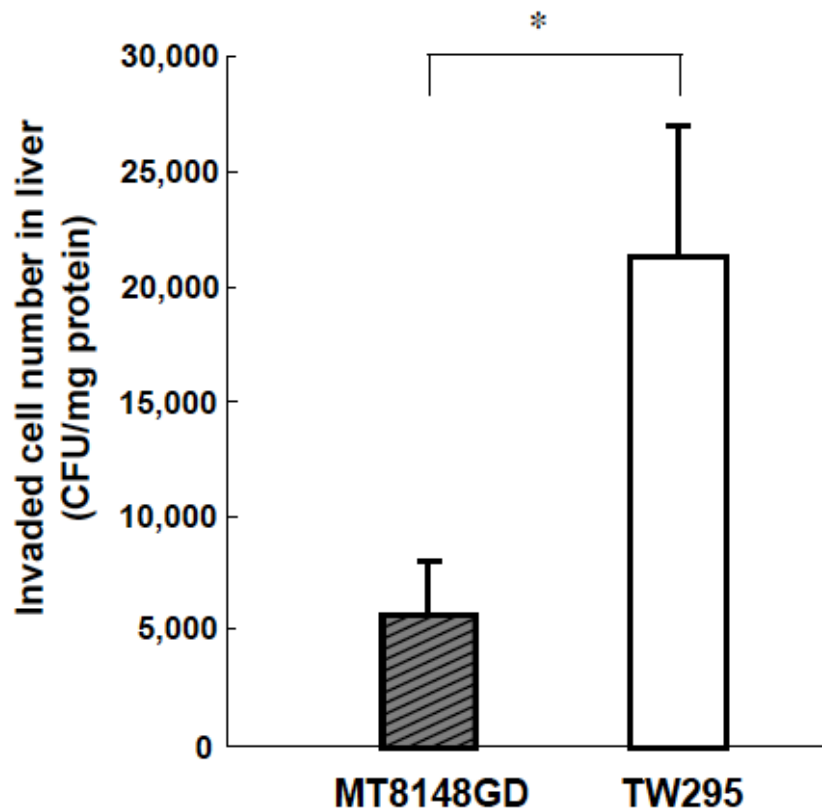

**Supplementary Figure S4. Localization of MT8148GD in liver tissues.**

Localization of MT8148GD, the isogenic mutant strain of MT8148 with a glucose deflection in the side chain, in liver tissues was investigated in vivo colitis mice. Briefly, 180 min after the administration of MT8148GD or TW295 ( $1 \times 10^7$  CFU) in colitis mice, liver samples were collected. The samples were minced and squeezed, then were inoculated onto MSB agar plates and anaerobically incubated according to the method described in Method section. The viable cell numbers were counted and invaded cell numbers in liver are expressed as CFU/mg protein. Each column represents the mean  $\pm$  SEM from 3-6 different animals. Statistical significance was determined using Student's t-test. \*; statistically significant ( $p=0.0175$ ).

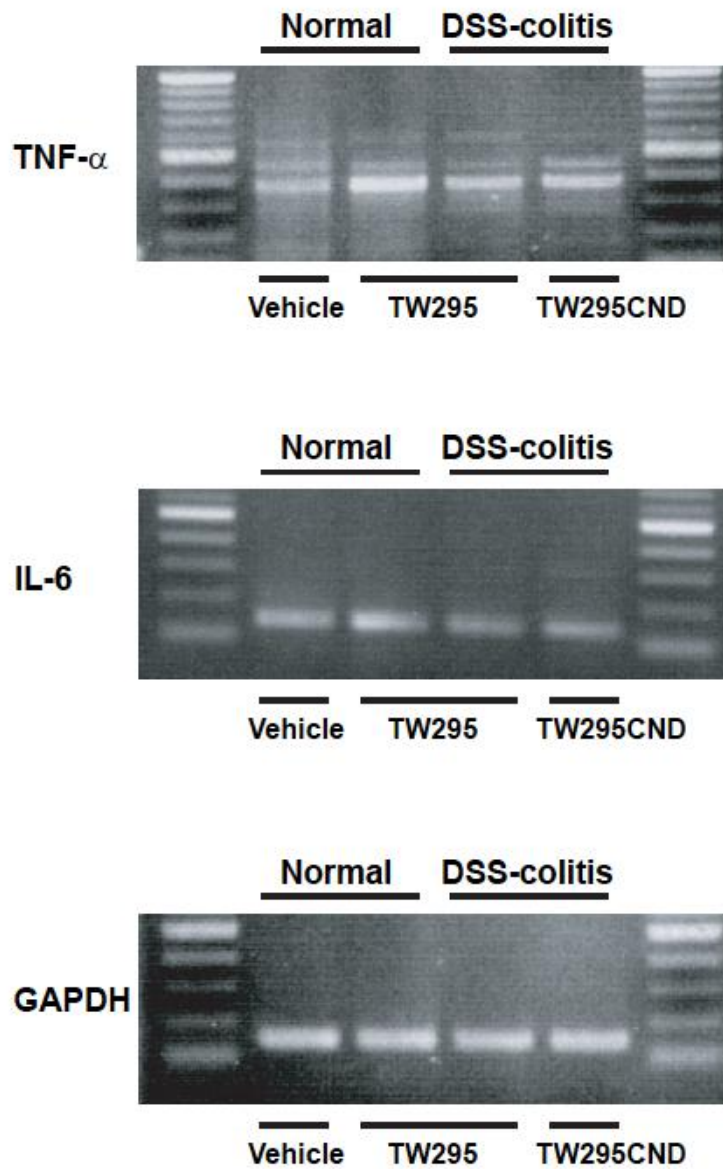

**Supplementary Figure S5. Effect of TW295 on the expression of inflammatory cytokines.**

Expression of TNF- $\alpha$  and IL-6 in liver tissues after the administration of TW295 or TW295CND to mice both in DSS-induced colitis and normal controls. GAPDH is an internal standard for PCR.

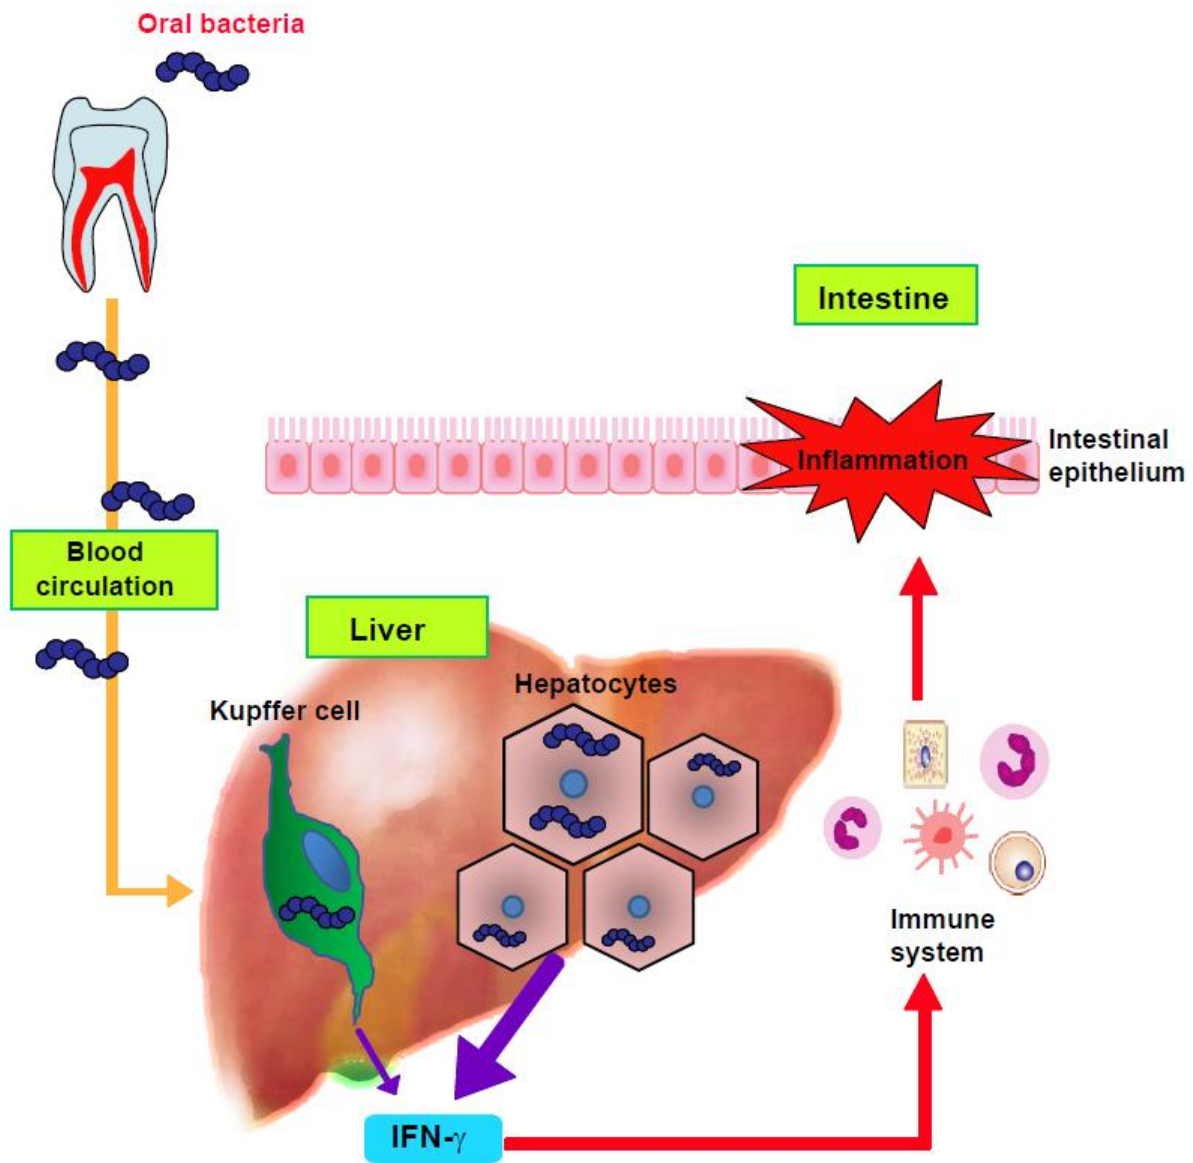

Supplementary Figure S6. Hypothetical mechanism of oral bacteria-mediated aggravation of colitis
